# Supplementary material for: Necrotic debris and STING exert therapeutically relevant effects on tumor cholesterol homeostasis
Source: PubMed Central journal article supplement (PMC8742871; doi:10.26508/lsa.202101256), 2022-01-04

# Figure 4C

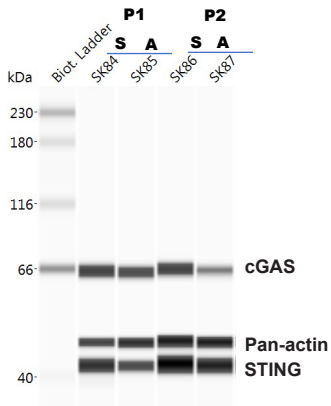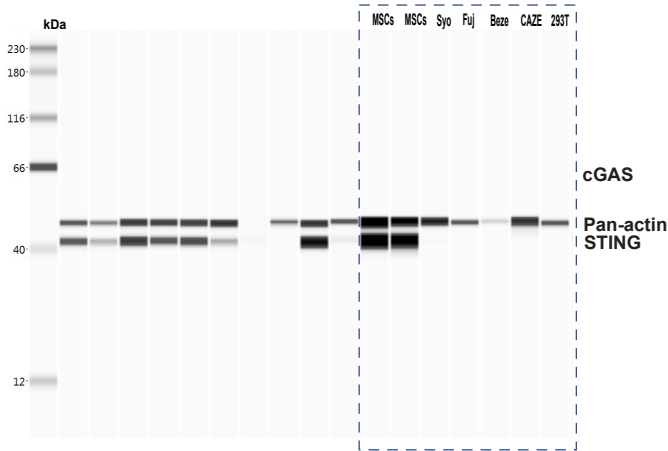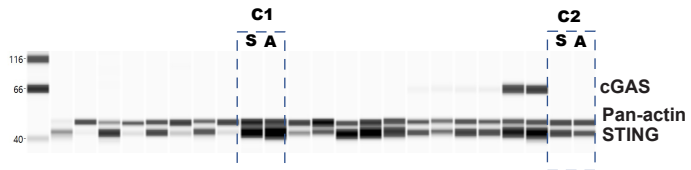

Supplement: LSA-2021-01256_SdataF4.1.pdf [file LSA-2021-01256_SdataF4.1.pdf]
