# Supplementary material for: Necrotic debris and STING exert therapeutically relevant effects on tumor cholesterol homeostasis
Source: PubMed Central journal article supplement (PMC8742871; doi:10.26508/lsa.202101256), 2022-01-04

**Figure S7A**

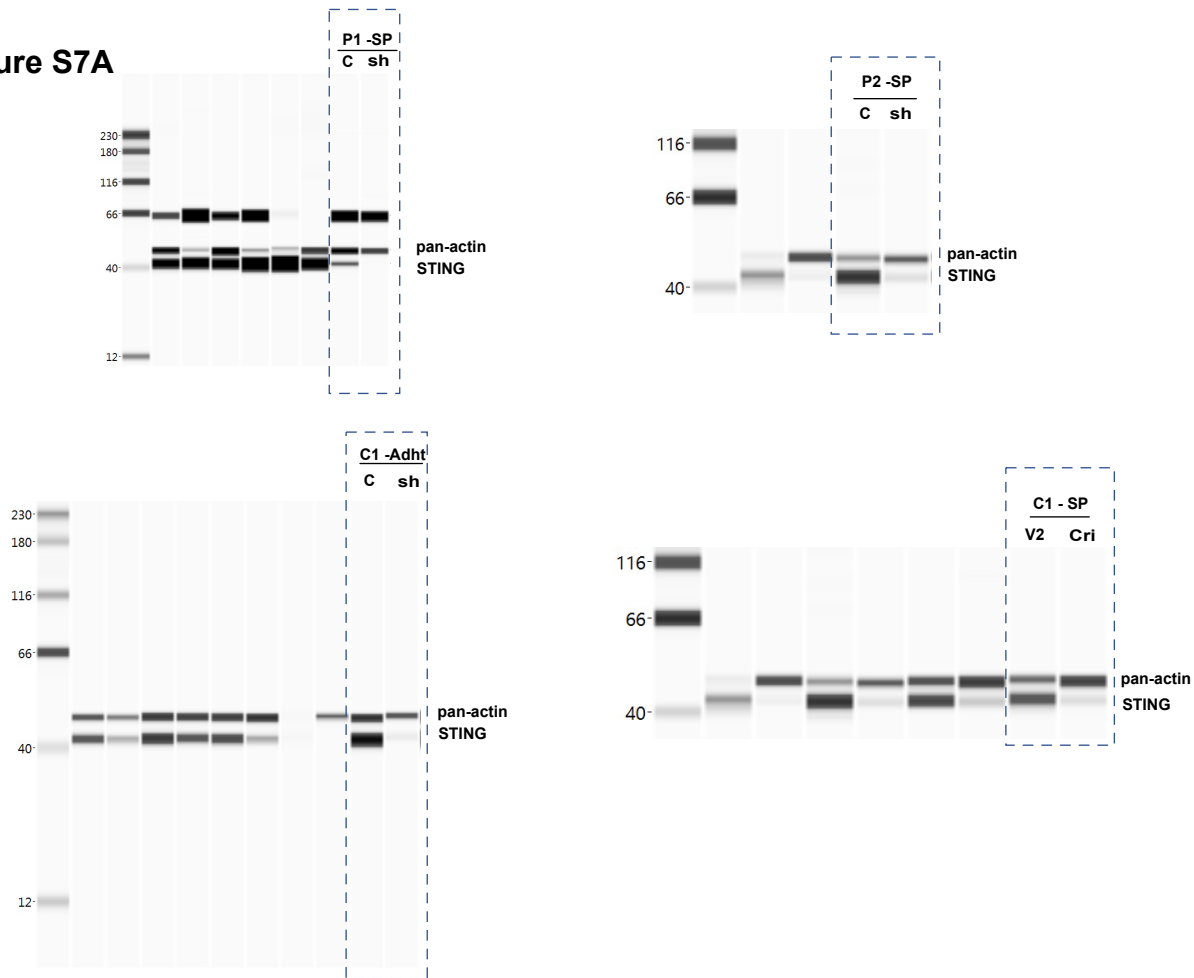

Supplement: LSA-2021-01256_SdataFS7.pdf [file LSA-2021-01256_SdataFS7.pdf]
